# Supplementary material for: Aberrant substrate engagement of the ER translocon triggers degradation by the Hrd1 ubiquitin ligase
Source: PubMed Central journal article supplement — J Cell Biol. 2012 Jun 11;197(6):761–73. doi: 10.1083/jcb.201203061 (PMC3373407; doi:10.1083/jcb.201203061), 2012-06-11
Supplement: supp_jcb.201203061_JCB_201203061_sm.pdf [file supp_jcb.201203061_JCB_201203061_sm.pdf]

Rubenstein et al., <http://www.jcb.org/cgi/content/full/jcb.201203061/DC1>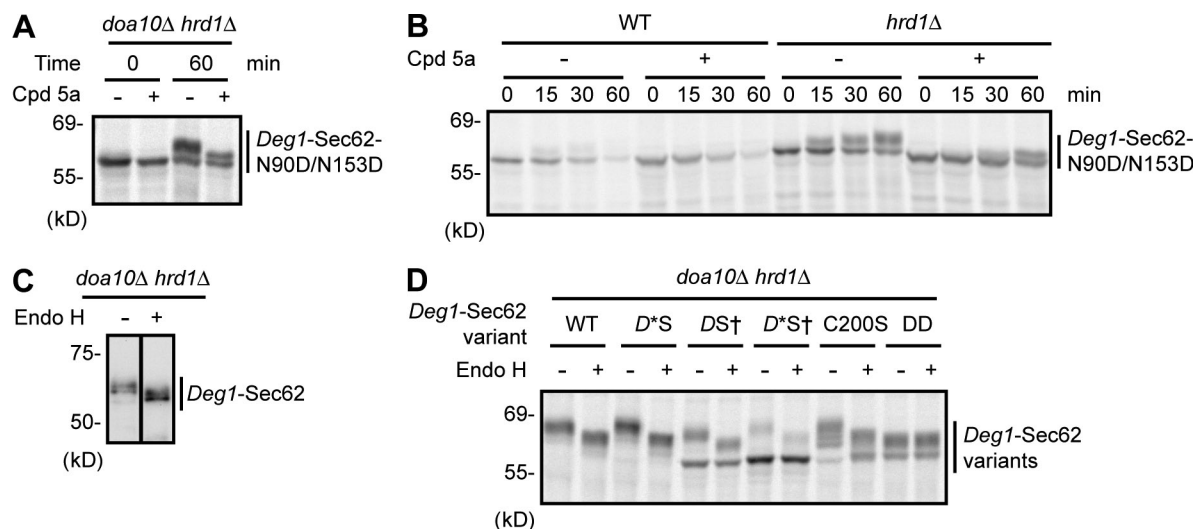

Figure S1. **PTM of *Deg1-Sec62*.** (A) *Deg1-Sec62* is O-mannosylated. Pulse-chase analysis of *doa10Δ hrd1Δ* yeast expressing *Deg1-Sec62-N90D/N153D* cultured for 3 h in the presence 1  $\mu$ M Compound 5a (a global inhibitor of O-mannosylation in yeast, see Materials and methods; Orchard et al., 2004) or DMSO at 30°C. Compound 5a (or DMSO) was maintained at the same concentrations throughout pulse labeling, washes, and chase in excess nonradioactive amino acids. Cycloheximide was included in the chase. *Deg1-Sec62-N90D/N153D* was precipitated with anti-Flag antibodies. (B) O-mannosylation is not necessary for Hrd1-mediated degradation. Pulse-chase analysis of *Deg1-Sec62-N90D/N153D* in the indicated yeast strains cultured for 3 h in the presence of 1  $\mu$ M Compound 5a or DMSO. Compound 5a (or DMSO) was maintained at the same concentrations throughout pulse labeling, washes, and chase in excess nonradioactive amino acids. Cycloheximide was included in the chase. *Deg1-Sec62-N90D/N153D* was precipitated with anti-Flag antibodies. (C) A cell lysate of *doa10Δ hrd1Δ* cells expressing *Deg1-Sec62* was incubated in the presence or absence of Endo H. Proteins were separated by SDS-PAGE, and *Deg1-Sec62* was detected by immunoblotting with peroxidase anti-peroxidase antibody, which recognizes the Protein A tag. (D) N-glycosylation of *Deg1-Sec62* variants. *doa10Δ hrd1Δ* yeast cells expressing "WT" *Deg1-Sec62* or the indicated *Deg1-Sec62* variants were pulse labeled for 10 min and lysed after 60 min in the presence of excess nonradioactive amino acids and cycloheximide. *Deg1* fusion proteins were precipitated with anti-Flag antibodies and incubated in the presence or absence of Endo H before being separated by SDS-PAGE and visualized by autoradiography. These results demonstrate that the modified subpopulations of the *Deg1-Sec62* variants presented throughout this study are N-glycosylated, which indicates that they have each undergone the same manner of *Deg1*-stimulated topological rearrangement as "WT" *Deg1-Sec62*. The kinetics of attaining this rearrangement differ among the *Deg1-Sec62* mutants (see main text). *D*\*S, *Deg1*\*-*Sec62*. *DS*†, *Deg1*-*sec62*†. *D*\*S†, *Deg1*\*-*sec62*†. C200S, *Deg1-Sec62-C200S*. DD, *Deg1*\*-*Sec62-N90D/N153D*. *Deg1*\*, F18S/I22T double mutant. *sec62*†, G127D of *Deg1-Sec62*, equivalent to G37D of untagged *Sec62*.

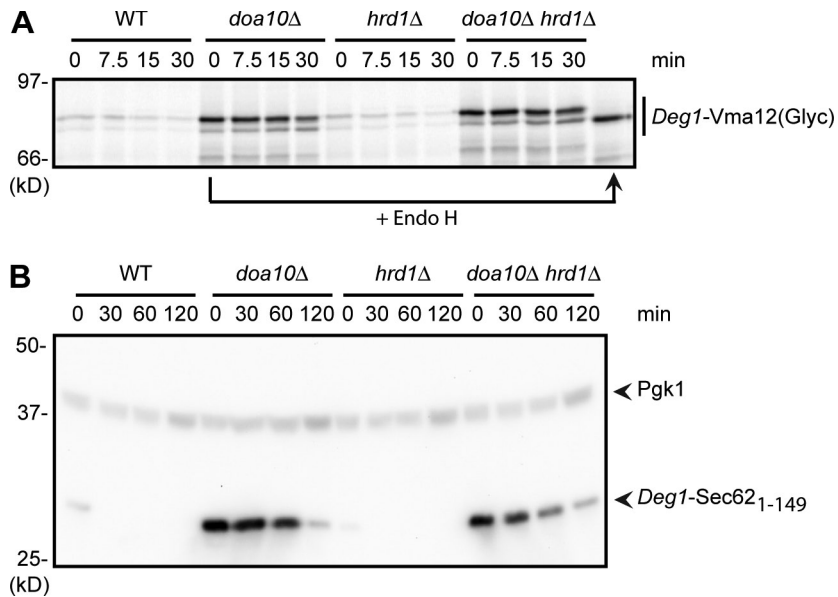

Figure S2. **Doa10-dependent degradation of *Deg1* fusion proteins.** (A) N-glycosylation does not inhibit Doa10-dependent degradation of *Deg1*-Vma12. Pulse-chase analysis of a *Deg1*-Vma12-KanMX6 derivative, which has a fragment of the Suc2 protein bearing two N-glycosylation sites inserted in its ER luminal loop, was performed in the indicated yeast strains. *Deg1*-Vma12(Glyc)-KanMX6 was precipitated with anti-*Deg1* antibodies. The indicated sample was treated with Endo H before separation by SDS-PAGE and autoradiography. (B) *Deg1*-Sec62<sub>1-149</sub> is a Doa10 substrate. Shown is a cycloheximide chase analysis of a *Deg1* fusion to the first 149 amino acids of Sec62 expressed from the *GAL1* promoter in the indicated yeast strains grown in SD medium containing 2% galactose. *Deg1*-Sec62<sub>1-149</sub> was detected by anti-Flag immunoblotting. Pgk1 serves as a loading control and was detected by anti-Pgk1 immunoblotting.

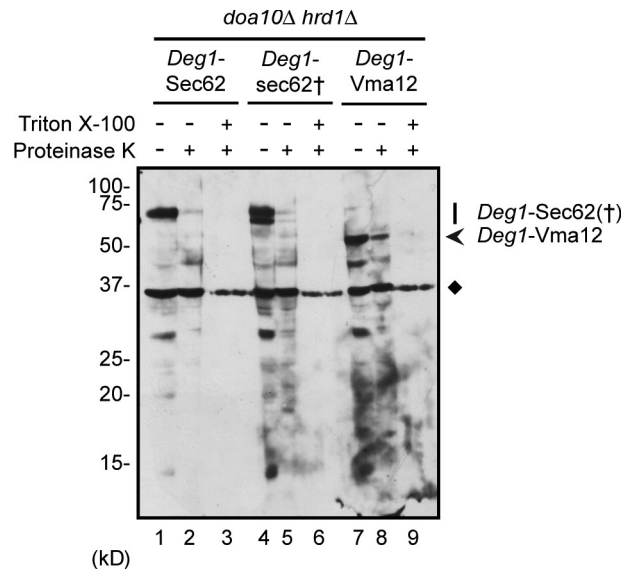

Figure S3. **Membrane topology of *Deg1*-Sec62, *Deg1*-sec62†, and *Deg1*-Vma12.** Intact microsomal membranes prepared from *doa10Δ hrd1Δ* cells expressing *Deg1*-Sec62, *Deg1*-sec62†, or *Deg1*-Vma12 were incubated with 5 μg/ml Proteinase K and 1% Triton X-100 as indicated. Samples were separated by SDS-PAGE and detected by anti-*Deg1* immunoblotting. The closed diamond denotes a nonspecific band. sec62†, G127D of *Deg1*-Sec62, equivalent to G37D of untagged Sec62.

Table S1. Yeast strains used in this study

| Name    | Genotype                                                                                                                                             | Source                                     |
|---------|------------------------------------------------------------------------------------------------------------------------------------------------------|--------------------------------------------|
| MHY496  | MATa <i>his3-Δ200 leu2-3,112 ura3-52 lys2-801 trp1-1 gal2 ubc6-Δ1::HIS3</i>                                                                          | Sommer and Jentsch, 1993                   |
| MHY500  | MATa <i>his3-Δ200 leu2-3,112 ura3-52 lys2-801 trp1-1 gal2</i>                                                                                        | Chen et al., 1993                          |
| MHY507  | MATα <i>his3-Δ200 leu2-3,112 ura3-52 lys2-801 trp1-1 gal2 ubc7::LEU2</i>                                                                             | Jungmann et al., 1993                      |
| MHY552  | MATα <i>his3-Δ200 leu2-3,112 ura3-52 lys2-801 trp1-1 gal2 ubc6-Δ1::HIS3 ubc7::LEU2</i>                                                               | Chen et al., 1993                          |
| MHY1669 | MATα <i>his3-Δ200 leu2-3,112 ura3-52 lys2-801 trp1-1 gal2 hrd1Δ::LEU2</i>                                                                            | Bays et al., 2001;<br>Swanson et al., 2001 |
| MHY1685 | MATa <i>his3-Δ200 leu2-3,112 ura3-52 lys2-801 trp1-1 gal2 doa10Δ::HIS3</i>                                                                           | Huyer et al., 2004                         |
| MHY1702 | MATa <i>his3-Δ200 leu2-3,112 ura3-52 lys2-801 trp1-1 gal2 doa10Δ::HIS3 hrd1Δ::LEU2</i>                                                               | Huyer et al., 2004                         |
| MHY2822 | MATa <i>his3-Δ200 leu2-3,112 ura3-52 lys2-801 trp1-1 gal2 hrd1Δ::LEU2</i>                                                                            | Huyer et al., 2004                         |
| MHY2972 | MATa <i>his3Δ1 leu2Δ0 ura3Δ0 met15Δ0 (aka BY4741)</i>                                                                                                | Tong et al., 2001                          |
| MHY3032 | MATa <i>his3Δ1 leu2Δ0 ura3Δ0 met15Δ0 hrd1Δ::kanMX4</i>                                                                                               | Tong et al., 2001                          |
| MHY3253 | MATa <i>his3Δ1 leu2Δ0 ura3Δ0 met15Δ0 der1Δ::kanMX4 dfm1Δ::kanMX4</i>                                                                                 | This study                                 |
| MHY5306 | MATa <i>his3Δ1 leu2Δ0 ura3Δ0 met15Δ0 yos9Δ::kanMX4</i>                                                                                               | Tong et al., 2001                          |
| MHY6478 | MATa <i>his3Δ1 leu2Δ0 ura3Δ0 met15Δ0 usa1Δ::kanMX4</i>                                                                                               | Tong et al., 2001                          |
| MHY6701 | MATa <i>his3-Δ200 leu2-3,112 ura3-52 lys2-801 trp1-1 gal2 lhs1Δ::kanMX4 doa10Δ::HIS3 hrd1Δ::LEU2</i>                                                 | This study                                 |
| MHY6703 | MATa <i>his3-Δ200 leu2-3,112 ura3-52 lys2-801 trp1-1 gal2 lhs1Δ::kanMX4</i>                                                                          | This study                                 |
| MHY6705 | MATa <i>his3-Δ200 leu2-3,112 ura3-52 lys2-801 trp1-1 gal2 lhs1Δ::kanMX4 hrd1Δ::LEU2</i>                                                              | This study                                 |
| MHY6707 | MATa <i>his3-Δ200 leu2-3,112 ura3-52 lys2-801 trp1-1 gal2 lhs1Δ::kanMX4 doa10Δ::HIS3</i>                                                             | This study                                 |
| MHY6792 | MATa <i>his3-Δ200 leu2-3,112 ura3-52 lys2-801 trp1-1 gal2 sec61Δ::HIS3 [pRS314-Sec61-C373S]</i>                                                      | This study                                 |
| MHY6794 | MATa <i>his3-Δ200 leu2-3,112 ura3-52 lys2-801 trp1-1 gal2 sec61Δ::HIS3 doa10Δ::hphMX4 [pRS314-Sec61-C373S]</i>                                       | This study                                 |
| MHY6796 | MATa <i>his3-Δ200 leu2-3,112 ura3-52 lys2-801 trp1-1 gal2 sec61Δ::HIS3 hrd1Δ::kanMX4 [pRS314-Sec61-C373S]</i>                                        | This study                                 |
| MHY6798 | MATa <i>his3-Δ200 leu2-3,112 ura3-52 lys2-801 trp1-1 gal2 sec61Δ::HIS3 doa10Δ::hphMX4 hrd1Δ::kanMX4 [pRS314-Sec61-C373S]</i>                         | This study                                 |
| MHY6893 | MATα <i>his3-Δ200 leu2Δ1 ura3Δ99 trp1Δ99 ade2-101(ochre) sec63-201 doa10Δ::kanMX4 (derived from DNY65 and DNY234; Ng et al., 1996)</i>               | This study                                 |
| MHY6894 | MATa <i>his3-Δ200 leu2Δ1 ura3Δ99 trp1Δ99 ade2-101(ochre) sec63-201 hrd1Δ::kanMX4 (derived from DNY65 and DNY234; Ng et al., 1996)</i>                | This study                                 |
| MHY6897 | MATa <i>his3-Δ200 leu2Δ1 ura3Δ99 trp1Δ99 ade2-101(ochre) sec63-201 (derived from DNY65 and DNY234; Ng et al., 1996)</i>                              | This study                                 |
| MHY6899 | MATa <i>his3-Δ200 leu2Δ1 ura3Δ99 trp1Δ99 ade2-101(ochre) sec63-201 hrd1Δ::kanMX4 doa10Δ::kanMX4 (derived from DNY65 and DNY234; Ng et al., 1996)</i> | This study                                 |
| MHY7120 | MATa <i>his3Δ1 leu2Δ0 ura3Δ0 met15Δ0 hrd3Δ::kanMX4</i>                                                                                               | Tong et al., 2001                          |
| MHY7321 | MATa <i>his3-Δ200 leu2-3,112 ura3-52 lys2-801 trp1-1 gal2 sec61Δ::HIS3 [pEM598/pRS315-sec61-L7B(ala)]</i>                                            | This study                                 |
| MHY7323 | MATa <i>his3-Δ200 leu2-3,112 ura3-52 lys2-801 trp1-1 gal2 sec61Δ::HIS3 doa10Δ::hphMX4 [pEM598/pRS315-sec61-L7B(ala)]</i>                             | This study                                 |
| MHY7325 | MATa <i>his3-Δ200 leu2-3,112 ura3-52 lys2-801 trp1-1 gal2 sec61Δ::HIS3 hrd1Δ::kanMX4 [pEM598/pRS315-sec61-L7B(ala)]</i>                              | This study                                 |
| MHY7327 | MATa <i>his3-Δ200 leu2-3,112 ura3-52 lys2-801 trp1-1 gal2 sec61Δ::HIS3 doa10Δ::hphMX4 hrd1Δ::kanMX4 [pEM598/pRS315-sec61-L7B(ala)]</i>               | This study                                 |

Table S2. Plasmids used in this study (in order of first presentation)

| Name                                                          | Description                                                                                                                                     | Source                      | Figures                                                           |
|---------------------------------------------------------------|-------------------------------------------------------------------------------------------------------------------------------------------------|-----------------------------|-------------------------------------------------------------------|
| pRS414-P <sub>MET25</sub> -Deg1-Flag-Vma12-2xProtA            | CEN, <i>TRP1</i>                                                                                                                                | Ravid et al., 2006          | 1 C and S3                                                        |
| pRS414-P <sub>MET25</sub> -Deg1-Flag-Sec62-2xProtA            | CEN, <i>TRP1</i>                                                                                                                                | Mayer et al., 1998          | 1 D, 1 F, and S3                                                  |
| pRS416-P <sub>MET25</sub> -Deg1*-Flag-Sec62-2xProtA           | CEN, <i>TRP1</i><br><i>Deg1*</i> = F18S, I22T                                                                                                   | This paper                  | 1 H, 6 A,<br>and S1 D                                             |
| pRS416-P <sub>MET25</sub> -Deg1-Flag-Sec62-2xProtA            | CEN, <i>URA3</i>                                                                                                                                | This paper                  | 2 A; 3, A and B;<br>4, A-C; 5, A, B,<br>and D; and S1,<br>C and D |
| pRS416-P <sub>MET25</sub> -Deg1-Flag-Sec62-2xProtA-N90D       | CEN, <i>URA3</i>                                                                                                                                | This paper                  | 2 A                                                               |
| pRS416-P <sub>MET25</sub> -Deg1-Flag-Sec62-2xProtA-N153D      | CEN, <i>URA3</i>                                                                                                                                | This paper                  | 2 A                                                               |
| pRS416-P <sub>MET25</sub> -Deg1-Flag-Sec62-2xProtA-N90D/N153D | CEN, <i>URA3</i>                                                                                                                                | This paper                  | 2, A and B; and<br>S1, A, B, and D                                |
| pRS315-P <sub>PRC1</sub> -CPY*<br>(aka pMW319)                | CEN, <i>LEU2</i><br>CPY* = G255R                                                                                                                | Willer et al., 2008         | 3 A                                                               |
| pRS414-P <sub>MET25</sub> -Deg1-Flag-sec62†-2xProtA           | CEN, <i>TRP1</i><br><i>sec62†</i> = <i>sec62-1</i> = G127D                                                                                      | This paper                  | 4 A and S3                                                        |
| pRS313                                                        | CEN, <i>HIS3</i>                                                                                                                                | Sikorski and Hieter, 1989   | 4 B                                                               |
| pRS313-Sec63<br>(aka pDN210)                                  | CEN, <i>HIS3</i>                                                                                                                                | Ng and Walter, 1996         | 4 C                                                               |
| pRS414-P <sub>MET25</sub> -Deg1*-Flag-sec62†-2xProtA          | CEN, <i>TRP1</i><br><i>Deg1*</i> = F18S, I22T<br><i>sec62†</i> = <i>sec62-1</i> = G127D                                                         | This paper                  | 4 D                                                               |
| pRS315-sec61-L7B(ala)<br>(aka pEM598)                         | CEN, <i>LEU2</i><br>Q308A, I323A, W326A, L342A                                                                                                  | Trueman et al., 2011        | 5 A                                                               |
| pRS416-P <sub>MET25</sub> -Deg1-Flag-Sec62-2xProtA-C200S      | CEN, <i>URA3</i>                                                                                                                                | This paper                  | 5 C and S1 D                                                      |
| pRS314-Sec61-C373S                                            | CEN, <i>TRP1</i>                                                                                                                                | Scott and Schekman,<br>2008 | 5 D                                                               |
| YCp50-P <sub>PRC1</sub> -CPY*-HA<br>(aka pDN431)              | CEN, <i>URA3</i>                                                                                                                                | Ng et al., 2000             | 6 B                                                               |
| YCp50-P <sub>GAL1/10</sub> -ApoB29-3HA<br>(aka pSLW1-B29)     | CEN, <i>URA3</i><br>Encodes 29% of human ApoB;<br>Human pre-pro ApoB sequence replaced with<br>pre-pro sequence from yeast pre-pro-alpha factor | Hzizo et al., 2007          | 7, A-C                                                            |
| pJJB20                                                        | CEN, <i>URA3</i><br>Vector encoding pre-pro sequence (amino acids<br>1-100) from yeast pre-pro-alpha factor                                     | Hzizo et al., 2007          | 7 A                                                               |
| pRS416-P <sub>MET25</sub> -Deg1-Flag-sec62†-2xProtA           | CEN, <i>URA3</i><br><i>sec62†</i> = <i>sec62-1</i> = G127D                                                                                      | This paper                  | S1 D                                                              |
| pRS416-P <sub>MET25</sub> -Deg1*-Flag-sec62†-2xProtA          | CEN, <i>URA3</i><br><i>Deg1*</i> = F18S, I22T<br><i>sec62†</i> = <i>sec62-1</i> = G127D                                                         | This paper                  | S1 D                                                              |
| pRS414-P <sub>MET25</sub> -Deg1-Flag-Vma12(Glyc)-KanMX6       | CEN, <i>TRP1</i><br>Glyc = 2 glycosylation sites from Suc2 inserted<br>in ER luminal loop of Vma12                                              | This paper                  | S2 A                                                              |
| pRS426-P <sub>GAL1/10</sub> -Deg1-Flag-Sec62(1-149)           | 2 $\mu$ , <i>URA3</i><br>Sec62 truncated at amino acid 149                                                                                      | Scott and Schekman,<br>2008 | S2 B                                                              |

## References

- Bays, N.W., R.G. Gardner, L.P. Seelig, C.A. Joazeiro, and R.Y. Hampton. 2001. Hrd1p/Der3p is a membrane-anchored ubiquitin ligase required for ER-associated degradation. *Nat. Cell Biol.* 3:24–29. <http://dx.doi.org/10.1038/35050524>
- Chen, P., P. Johnson, T. Sommer, S. Jentsch, and M. Hochstrasser. 1993. Multiple ubiquitin-conjugating enzymes participate in the in vivo degradation of the yeast MAT alpha 2 repressor. *Cell.* 74:357–369. [http://dx.doi.org/10.1016/0092-8674\(93\)90426-Q](http://dx.doi.org/10.1016/0092-8674(93)90426-Q)
- Hzizo, S.L., V. Gusarova, D.M. Habel, J.L. Goeckeler, E.A. Fisher, and J.L. Brodsky. 2007. The Hsp110 molecular chaperone stabilizes apolipoprotein B from endoplasmic reticulum-associated degradation (ERAD). *J. Biol. Chem.* 282:32665–32675. <http://dx.doi.org/10.1074/jbc.M705216200>
- Huyer, G., W.F. Piluek, Z. Fansler, S.G. Kreft, M. Hochstrasser, J.L. Brodsky, and S. Michaelis. 2004. Distinct machinery is required in *Saccharomyces cerevisiae* for the endoplasmic reticulum-associated degradation of a multispanning membrane protein and a soluble luminal protein. *J. Biol. Chem.* 279:38369–38378. <http://dx.doi.org/10.1074/jbc.M402468200>
- Jungmann, J., H.A. Reins, C. Schobert, and S. Jentsch. 1993. Resistance to cadmium mediated by ubiquitin-dependent proteolysis. *Nature.* 361:369–371. <http://dx.doi.org/10.1038/361369a0>
- Mayer, T.U., T. Braun, and S. Jentsch. 1998. Role of the proteasome in membrane extraction of a short-lived ER-transmembrane protein. *EMBO J.* 17:3251–3257. <http://dx.doi.org/10.1093/emboj/17.12.3251>
- Ng, D.T., and P. Walter. 1996. ER membrane protein complex required for nuclear fusion. *J. Cell Biol.* 132:499–509. <http://dx.doi.org/10.1083/jcb.132.4.499>
- Ng, D.T., J.D. Brown, and P. Walter. 1996. Signal sequences specify the targeting route to the endoplasmic reticulum membrane. *J. Cell Biol.* 134:269–278. <http://dx.doi.org/10.1083/jcb.134.2.269>
- Ng, D.T., E.D. Spear, and P. Walter. 2000. The unfolded protein response regulates multiple aspects of secretory and membrane protein biogenesis and endoplasmic reticulum quality control. *J. Cell Biol.* 150:77–88. <http://dx.doi.org/10.1083/jcb.150.1.77>
- Orchard, M.G., J.C. Neuss, C.M. Galley, A. Carr, D.W. Porter, P. Smith, D.I. Scopes, D. Haydon, K. Vousden, C.R. Stubberfield, et al. 2004. Rhodanine-3-acetic acid derivatives as inhibitors of fungal protein mannosyl transferase 1 (PMT1). *Bioorg. Med. Chem. Lett.* 14:3975–3978. <http://dx.doi.org/10.1016/j.bmcl.2004.05.050>
- Ravid, T., S.G. Kreft, and M. Hochstrasser. 2006. Membrane and soluble substrates of the Doa10 ubiquitin ligase are degraded by distinct pathways. *EMBO J.* 25:533–543. <http://dx.doi.org/10.1038/sj.emboj.7600946>
- Scott, D.C., and R. Schekman. 2008. Role of Sec61p in the ER-associated degradation of short-lived transmembrane proteins. *J. Cell Biol.* 181:1095–1105. <http://dx.doi.org/10.1083/jcb.200804053>
- Sikorski, R.S., and P. Hieter. 1989. A system of shuttle vectors and yeast host strains designed for efficient manipulation of DNA in *Saccharomyces cerevisiae*. *Genetics.* 122:19–27.
- Sommer, T., and S. Jentsch. 1993. A protein translocation defect linked to ubiquitin conjugation at the endoplasmic reticulum. *Nature.* 365:176–179. <http://dx.doi.org/10.1038/365176a0>
- Swanson, R., M. Locher, and M. Hochstrasser. 2001. A conserved ubiquitin ligase of the nuclear envelope/endoplasmic reticulum that functions in both ER-associated and Matalpha2 repressor degradation. *Genes Dev.* 15:2660–2674. <http://dx.doi.org/10.1101/gad.933301>
- Tong, A.H., M. Evangelista, A.B. Parsons, H. Xu, G.D. Bader, N. Pagé, M. Robinson, S. Raghibizadeh, C.W. Hogue, H. Bussey, et al. 2001. Systematic genetic analysis with ordered arrays of yeast deletion mutants. *Science.* 294:2364–2368. <http://dx.doi.org/10.1126/science.1065810>
- Trueman, S.F., E.C. Mandon, and R. Gilmore. 2011. Translocation channel gating kinetics balances protein translocation efficiency with signal sequence recognition fidelity. *Mol. Biol. Cell.* 22:2983–2993. <http://dx.doi.org/10.1091/mbc.E11-01-0070>
- Willer, M., G.M. Forte, and C.J. Stirling. 2008. Sec61p is required for ERAD-L: genetic dissection of the translocation and ERAD-L functions of Sec61P using novel derivatives of CPY. *J. Biol. Chem.* 283:33883–33888. <http://dx.doi.org/10.1074/jbc.M803054200>
